# Supplementary material
Source: PubMed Central journal article supplement (PMC3062422)
Supplement: supp_138.8.1521_DEV063537TableS1.pdf [file supp_138.8.1521_DEV063537TableS1.pdf]

**Table S1. Total number of PH3-positive (mitotic) cells over the total number of cells analysed in the VE**

| Group      | <i>n</i> | Region       | PH3 <sup>+</sup> /total |
|------------|----------|--------------|-------------------------|
| Pre-distal | 5        | VE           | 18/532                  |
| Distal     | 6        | DVE          | 4/166                   |
|            |          | emVE         | 4/265                   |
|            |          | exeVE        | 5/283                   |
| Tilted     | 5        | AVE          | 3/263                   |
|            |          | Posterior VE | 5/289                   |
|            |          | Left VE      | 1/198                   |
|            |          | Right VE     | 2/238                   |
| Migrated   | 8        | AVE          | 7/376                   |
|            |          | Posterior VE | 5/324                   |
|            |          | Left VE      | 4/269                   |
|            |          | Right VE     | 5/290                   |

The mitotic indexes were calculated by dividing the number of mitotic cells by the total number of cells analysed for each region for each embryo. The average of these individual embryo mitotic indexes is presented in the text and figures as the overall mitotic index.
